# Supplementary material for: Epidemiological profiles and pathogenicity of Vancomycin-resistant Enterococcus faecium clinical isolates in Taiwan
Source: PeerJ. 2023 Feb 23;11:e14859. doi: 10.7717/peerj.14859 (PMC9968458; doi:10.7717/peerj.14859)
Supplement: Supplemental Information 1 [file peerj-11-14859-s001.xlsx]

## Sheet: 工作表1
	esp	hyl	esp+hyl	ND
Ampicillin R	35	38.3333	13.3333	13.3333
Ampicillin S	0	0	0	0
CiprofloxacinR	35	38.3333	13.3333	13.3333
CiprofloxacinS	0	0	0	0
DaptomycinR	0	0	0	0
DaptomycinS	35	38.3333	13.3333	13.3333
DoxycyclineR	6.66667	16.6667	5	3.33333
DoxycyclineS	28.3333	21.6667	8.33333	10
ErythromycinR	35	38.3333	13.3333	13.3333
ErythromycinS	0	0	0	0
Gentamicin-SynergeR	8.3	30	10	8.33333
Gentamicin-SynergeS	26.6667	8.33333	3.33333	5
LevofloxacinR	35	38.3333	13.3333	13.3333
LevofloxacinS	0	0	0	0
LinezolidR	3.33333	6.66667	0	0
LinezolidS	33.3333	33.3333	11.6667	13.3333
MinocyclineR	21.6667	21.6667	5	8.33333
MinocyclineS	13.3333	16.6667	8.33333	5
NitrofurantoinR	35	33.3333	16.6667	13.3333
NitrofurantoinS	0	1.66667	0	0
Penicillin GR	35	38.3333	13.3333	13.3333
Penicillin GS	0	0	0	0
Quinupristin-dalfopristinR	5	3.3	0	3.33333
Quinupristin-dalfopristinS	30	35	13.3333	10
TeicoplaninR	26.6667	36.6667	11.6667	8.33333
TeicoplaninS	10	1.66667		5
TetracyclineR	28.3333	21.6667	8.33333	8.33333
TetracyclineS	6.66667	16.6667	5	5
VancomycinR	35	38.3333	13.3333	13.3333
VancomycinS	0	0	0	0
