# Supplementary material for: Epidemiological profiles and pathogenicity of Vancomycin-resistant Enterococcus faecium clinical isolates in Taiwan
Source: PeerJ. 2023 Feb 23;11:e14859. doi: 10.7717/peerj.14859 (PMC9968458; doi:10.7717/peerj.14859)
Supplement: Supplemental Information 2 [file peerj-11-14859-s002.xlsx]

## Sheet: 工作表1
							Virulence gene
	Sample		Isolated site		Biofilm formation		esp		hyl		asa1		gelE		cylA
	B2		blood		weak		ND		+		ND		ND		ND
	C3		urine		strong		ND		+		ND		ND		ND
	D4		urine		strong		ND		+		ND		ND		ND
	E10		urine		strong		ND		+		ND		ND		ND
	D12		urine		strong		ND		+		ND		ND		ND
	E21		urine		weak		ND		+		ND		ND		ND
	C30		urine		strong		+		+		ND		ND		ND
	C34		urine		strong		+		ND		ND		ND		ND
	D49		blood		moderate		+		+		ND		ND		ND
	A52		urine		strong		ND		+		ND		ND		ND
	B53		urine		strong		+		ND		ND		ND		ND
	B54		urine		moderate		+		ND		ND		ND		ND
	A58		stool		strong		+		ND		ND		ND		ND
	B59		blood		strong		+		ND		ND		ND		ND
	A68		urine		strong		ND		+		ND		ND		ND
	A69		pus		strong		ND		+		ND		ND		ND
	B73		urine		strong		+		ND		ND		ND		ND
	B99		urine		strong		+		+		ND		ND		ND
	E104		blood		strong		+		ND		ND		ND		ND
	C113		blood		strong		ND		+		ND		ND		ND
	B121		urine		strong		ND		ND		ND		ND		ND
	A126		urine		strong		+		ND		ND		ND		ND
	A127		urine		strong		+		+		ND		ND		ND
	A135		blood		moderate		+		ND		ND		ND		ND
	C9		urine		strong		+		ND		ND		ND		ND
	D23		urine		strong		ND		+		ND		ND		ND
	D36		urine		moderate		+		ND		ND		ND		ND
	B37		CSF		strong		ND		ND		ND		ND		ND
	B44		urine		strong		ND		+		ND		ND		ND
	A45		urine		strong		ND		ND		ND		ND		ND
	B51		urine		strong		+		ND		ND		ND		ND
	D61		urine		strong		+		ND		ND		ND		ND
	D65		urine		strong		ND		+		ND		ND		ND
	D67		blood		moderate		ND		ND		ND		ND		ND
	A80		urine		moderate		ND		+		ND		ND		ND
	C100		PUS		strong		+		ND		ND		ND		ND
	D110		urine		moderate		+		ND		ND		ND		ND
	B116		urine		moderate		+		ND		ND		ND		ND
	D117		urine		strong		+		ND		ND		ND		ND
	D125		body fluid		strong		+		ND		ND		ND		ND
	D129		urine		strong		+		ND		ND		ND		ND
	E5		urine		strong		ND		ND		ND		ND		ND
	D6		urine		moderate		ND		ND		ND		ND		ND
	D11		urine		moderate		ND		+		ND		ND		ND
	A18		PUS		moderate		ND		+		ND		ND		ND
	B22		urine		moderate		ND		+		ND		ND		ND
	D25		urine		moderate		ND		ND		ND		ND		ND
	B26		urine		moderate		ND		+		ND		ND		ND
	D31		urine		moderate		ND		ND		ND		ND		ND
	A40		urine		moderate		+		+		ND		ND		ND
	D55		urine		strong		ND		+		ND		ND		ND
	D56		urine		strong		+		ND		ND		ND		ND
	A83		urine		strong		+		+		ND		ND		ND
	D32		urine		strong		+		+		ND		ND		ND
	E41		urine		strong		+		ND		ND		ND		ND
	A46		urine		strong		ND		+		ND		ND		ND
	D77		urine		strong		ND		+		ND		ND		ND
	A79		pus		strong		ND		+		ND		ND		ND
	D87		urine		strong		+		+		ND		ND		ND
	C132		urine		strong		ND		+		ND		ND		ND
