# Supplementary material for: Epidemiological profiles and pathogenicity of Vancomycin-resistant Enterococcus faecium clinical isolates in Taiwan
Source: PeerJ. 2023 Feb 23;11:e14859. doi: 10.7717/peerj.14859 (PMC9968458; doi:10.7717/peerj.14859)
Supplement: Supplemental Information 4 [file peerj-11-14859-s004.xlsx]

## Sheet: ST17
MLST gene	sequence			gdh	purK	pstS	atpA	gyd	adk	ddl	ST type
gdh	GTCCCATCAGCATATCACGCATCTAATAGTAATTTTTCGTAAGCTTCTGGGCTATTTTCAACCATTTCTGCACTATTTCT AAATTCCAATTTGATTGGTTCCGTTTCAAATCCTTGCCCTACTTCTTTCCCATTCAAGGATAAAGAAAATCCTTCAGTTG GCTGAATATAGATCGTTAGAACATTAGGTGGAAGTGTCGTATCGTCACATGGTTCATCGACAGATGTTTTGAATACATTA ACAGGAACTTGTTTGAATACGATGTTGATCCGAGTCCCTTTTTCAGTCAAACGTTTGCCTGTACGTACATAGAAAGGAAC ACCTGACCAACGGAAGTTATCGATAGTGAATTTGCCTGCGACGAATGTTTCAGTCTCTGATTGAGCATCCACTTT…		MLST Number	1	1	1	1	1	1	1	ST17
purK	TATCTACTTTCTACCCCTAAACACCTGAAAGGCTCACTGCTTCTGCAATCACACGGGCAATACGCTCAGCCTCCTCGATC ACATCCTGATCAATCGCGGCTGGAGCAATCGTTTCATGAAGAATATTGTTGTGGTGGATGTTTTCCACGACCGGAAAAGT CGTGAAATCTCCTTGACCATTTCCTGCCACCATGATCGAAATCTCTTTTTCAAACGGGATCCATGCTTCTAAAACACAGG TTCCTTCTCTTAAAAGGTCCATGGCAGGAGCTAGATCCGCCCGACTTTTCAAAACATACTGCCCCTTGCCATCATAGCCG CCTCGAGTGGTTTTCAAAACACAAGGATAGCCGATCCCGTCAATCGCATCTTGGATATCCGTCGGACTGACGATC…
pstS	TGTATGCTATAGCCCATTTCTTTGACAGGTCCTTCTTGGATTTCTTCTGTCATCATGTAGTCTAAGAATTTTTGGACTTC AGGGGAAGGTTTTCCGTTCGTGTACATATGTTCATATGACCAGATTCCCCAGCTGTTATCTGCTACATTCTCTTCTTTTG GTTCTACACCGTCGATACTTAGTGCTTGTGTGGAATCATCGAGATATGAGAAAGCTAAATAGCTGATTGCTCCTGGTGTT TGACTTACCAGCTGCCGAACTGTTCCTGATGAATCTTGTTCTTGGGACTGCACAGGGGTAGCACCATCCAGTCCCCATTT TTCGAATGTCGCGCGGGTACCGCTGCCGTTTGCACGGTTCACGACGTTGATTTTTTGATCTTTCCCGCCAACTTC…
atpA	TGTCATCTCACATGATCAGACATGTTTCCCGTTGTACATGAACTCTTCACCCATTGCAGTACCAGCATATGGTGCGATAT AAAGCAACGGCGCTGGTTGAGACGCACCGGCATTCACAACGATTGTGTAATCCATTGCGCCATATTTTTTCAATGTTTCA ACTTGTGTACGAACTGTAGAATCTTTTTGTCCGATTGCTACATAGATACAGATCATATCTTGACCTTTTTGGTTGATGAT CGTATCGATCGCAATGGAAGTTTTCCCTGTTTTACGGTCACCGATAACTAATTCACGTTGGCCGCGTCCGATTGGTACAA GAGCGTCGATTGCTTTTAGACCTGTTTGCATTGGTTCGTTAACAGATTTACGTTGCATAACGCCTGGTGCCATTG…
gyd	AATGTTCTAGTTGTTTGTCGCCACTGTCATTACTTTAGTTTGTGTAGCATCAAATAATGAACCGTAAGTCATACCAACGA TATCTGAAGAAACGATTTCGTCTGTGTTGTATCCGTAAGATTCGTTTGAAGCTTCTTTCATTGCTGCATTGATTTCGTCA ACAGTTACTTCTTTTTCAAGAACTGTTACTAATTCTGTTAATGAACCTGTTGGTACAGGAACACGTTGAGCAGCTCCGTC TAATTTACCGTTCAATTCAGGAATTACTAAACCGATAGCTTTAGCAGCACCTGTTGAGTTAGGAACGATGTTTGCAGCAG CAGCGCGTGCACGGCGGAAGTCACCTTTAGGATGAGGTCCGTCTAGAGTCATTTGGTCACCTGTGTAAGCGTGGA…
adk	GAGCAGTAGACCAGCTGAAATCATTGATGCTTATGGTATTCCGCACATCTCAACAGGAGATATGTTCCGCGCAGCGATGC AAAACGAAACAGCTCTTGGCCTGGAAGCAAAGTCTTATATGGATAAAGGTGCATTAGTTCCTGATGAAGTAACAAATGGA ATCGTGAAAGAGCGACTAGCTGAACCAGATACAGAGAAAGGCTTCTTATTAGATGGCTTTCCACGTACGCTAGATCAAGC AAAAGCTCTGGACGCAATGCTAAAAGATTTGAATAAAAAAATTGATGCTGTCATCGATATCCATGTTGGTGAAGAAATCT TGGTCGAACGTCTAGCCGGCCGATTTATCTGCAGCAATTGTGGAGCAACTTACCATAAAATTTTCAACCCTACAA…
ddl	GCCATTGATATGCCTTATGTCGGCGCAGGCGTATTGACCAGTGCATGTGCCATGGATAAAATCATGACCAAGTATATTTTACAAGCTGCTGGTGTGCCGCAAGTTCCTTATGTACCAGTACTTAAGAATCAATGGAAAGAAAATCCTAAAAAAGTATTTGATCAATGTGAAGGTTCTTTGCTTTATCCGATGTTTGTCAAACCGGCGAATATGGGTTCTAGTGTCGGCATTACAAAAGCAGAAAACCGAGAAGAGCTGCAAAATGCTTTAGCAACAGCCTATCAGTATGATTCTCGAGCAATCGTTGAACAAGGAATTGAAGCGCGCGAAATCGAAGTTGCTGTATTAGGAAATGAAGACGTTCGGACGACTTTGCCTGGTGAAGTCGTAAAAGACGTA…

## Sheet: ST78
MLST gene	sequence			gdh	purK	pstS	atpA	gyd	adk	ddl	ST type
gdh	TCGGTTACATCACCATATCACGCATCTAATAGTAATTTTTCGTAAGCTTCTGGGCTATTTTCAACCATTTCTGCACTATT TCTAAATTCCAATTTGATTGGTTCCGTTTCAAATCCTTGCCCTACTTCTTTCCCATTCAAGGATAAAGAAAATCCTTCAG TTGGCTGAATATAGATCGTTAGAACATTAGGTGGAAGTGTCGTATCGTCACATGGTTCATCGACAGATGTTTTGAATACA TTAACAGGAACTTGTTTGAATACGATGTTGATCCGAGTCCCTTTTTCAGTCAAACGTTTGCCTGTACGTACATAGAAAGG AACACCTGACCAACGGAAGTTATCGATAGTGAATTTGCCTGCGACGAATGTTTCAGTCTCTGATTGAGCATCCAC…		MLST Number	1	1	1	15	1	1	1	ST78
purK	TAGATGAACTTCTCTACCCCTAAACACCTGAAAGGCTCACTGCTTTCTGCAATCACACGGGCAATACGCTCAGCCTCCTC GATCACATCCTGATCAATCGCGGCTGGAGCAATCGTTTCATGAAGAATATTGTTGTGGTGGATGTTTTCCACGACCGGAA AAGTCGTGAAATCTCCTTGACCATTTCCTGCCACCATGATCGAAATCTCTTTTTCAAACGGGATCCATGCTTCTAAAACA CAGGTTCCTTCTCTTAAAAGGTCCATGGCAGGAGCTAGATCCGCCCGACTTTTCAAAACATACTGCCCCTTGCCATCATA GCCGCCTCGAGTGGTTTTCAAAACACAAGGATAGCCGATCCCGTCAATCGCATCTTGGATATCCGTCGGACTGAC…
pstS	AGAGGGATGTTATAGCCATTCTTTTGACAGGTCCTTCTTGGATTTCTTTCTGTCATCATGTAGTCTAAGAATTTTTGGAC TTCAGGGGAAGGTTTTCCGTTCGTGTACATATGTTCATATGACCAGATTCCCCAGCTGTTATCTGCTACATTCTCTTCTT TTGGTTCTACACCGTCGATACTTAGTGCTTGTGTGGAATCATCGAGATATGAGAAAGCTAAATAGCTGATTGCTCCTGGT GTTTGACTTACCAGCTGCCGAACTGTTCCTGATGAATCTTGTTCTTGGGACTGCACAGGGGTAGCACCATCCAGTCCCCA TTTTTCGAATGTCGCGCGGGTACCGCTGCCGTTTGCACGGTTCACGACGTTGATTTTTTGATCTTTCCCGCCAAC…
atpA	CGACGCTAGAGTCATGATGTAGGTATCATTATCCTTGGCGATTTCGAGTCCATTCGTGAAGGAGATAAAGTAAAACGAAC AGGTAAGATCATGGAAGTTCCAGTTGGAGAGGCCTTGATCGGTCGGGTAGTCAATCCGCTAGGTCAACCAATCGACGGAC TAGGTGAAATCGTTACTGACAAAGCTCGTCCAGTAGAAGCGATGGCACCAGGTGTTATGCAACGTAAATCTGTTAACGAA CCAATGCAAACAGGGCTAAAAGCGATCGACGCCCTTGTGCCAATCGGACGCGGACAACGTGAATTAGTCATCGGTGACCG TAAAACAGGGAAAACTTCTATTGCGATTGATACGATCATCAACCAAAAAGGTCAAGATATGATCTGTATCTATGT…
gyd	CTAGTTGGTTTGTCGCCACTGTCATTACTTTAGTTTGTGTAGCATCAAATAATGAACCGTAAGTCATACCAACGATATCT GAAGAAACGATTTCGTCTGTGTTGTATCCGTAAGATTCGTTTGAAGCTTCTTTCATTGCTGCATTGATTTCGTCAACAGT TACTTCTTTTTCAAGAACTGTTACTAATTCTGTTAATGAACCTGTTGGTACAGGAACACGTTGAGCAGCTCCGTCTAATT TACCGTTCAATTCAGGAATTACTAAACCGATAGCTTTAGCAGCACCTGTTGAGTTAGGAACGATGTTTGCAGCAGCAGCG CGTGCACGGCGGAAGTCACCTTTAGGATGAGGTCCGTCTAGAGTCATTTGGTCACCTGTGTAAGCGTGGATAGTT…
adk	TGAACCCTCCAATTTAATGGGGCTGCCAGGCGCAGGTAAAGGAACACAAGCTGAAAAAATCATTGATGCTTATGGTATTCCGCACATCTCAACAGGAGATATGTTCCGCGCAGCGATGCAAAACGAAACAGCTCTTGGCCTGGAAGCAAAGTCTTATATGGATAAAGGTGCATTAGTTCCTGATGAAGTAACAAATGGAATCGTGAAAGAGCGACTAGCTGAACCAGATACAGAGAAAGGCTTCTTATTAGATGGCTTTCCACGTACGCTAGATCAAGCAAAAGCTCTGGACGCAATGCTAAAAGATTTGAATAAAAAAATTGATGCTGTCATCGATATCCATGTTGGTGAAGAAATCTTGGTCGAACGTCTAGCCGGCCGATTTATCTGCAGCAATTG…
ddl	CATACCATCGGTGTAAGCTAACTTCGCGTACTCTTGCGCTTTTTGATAAACTTCTTCTGGCACTTCGGCTGGAATCTGCA TTTCGATTTTATTATTGATATATTTTGCTTCATAATCATAGAATGCTACGTCTTTTACGACTTCACCAGGCAAAGTCGTC CGAACGTCTTCATTTCCTAATACAGCAACTTCGATTTCGCGCGCTTCAATTCCTTGTTCAACGATTGCTCGAGAATCATA CTGATAGGCTGTTGCTAAAGCATTTTGCAGCTCTTCTCGGTTTTCTGCTTTTGTAATGCCGACACTAGAACCCATATTCG CCGGTTTGACAAACATCGGATAAAGCAAAGAACCTTCACATTGATCAAATACTTTTTTAGGATTTTCTTTCCATT…

## Sheet: ST262
MLST gene	sequence		gdh	purK	pstS	atpA	gyd	adk	ddl	ST type
gdh	GGTTACATCACCATATCAACGCATCTAATAGTAATTTTTCGTAAGCTTCTGGGCTATTTTCAACCATTTCTGCACTATTT CTAAATTCCAATTTGATTGGTTCCGTTTCAAATCCTTGCCCTACTTCTTTCCCATTCAAGGATAAAGAAAATCCTTCAGT TGGCTGAATATAGATCGTTAGAACATTAGGTGGAAGTGTCGTATCGTCACATGGTTCATCGACAGATGTTTTGAATACAT TAACAGGAACTTGTTTGAATACGATGTTGATCCGAGTCCCTTTTTCAGTCAAACGTTTGCCTGTACGTACATAGAAAGGA ACACCTGACCAACGGAAGTTATCGATAGTGAATTTGCCTGCGACGAATGTTTCAGTCTCTGATTGAGCATCCACT…	MLST Number	1	1	7	7	5	1	1	ST262
purK	ATCTGTTACTTTCTACCCCTAAACACCTGAAGGCTCACTGCTTTCTGCAATCACACGGGCAATACGCTCAGCCTCCTCGA TCACATCCTGATCAATCGCGGCTGGAGCAATCGTTTCATGAAGAATATTGTTGTGGTGGATGTTTTCCACGACCGGAAAA GTCGTGAAATCTCCTTGACCATTTCCTGCCACCATGATCGAAATCTCTTTTTCAAACGGGATCCATGCTTCTAAAACACA GGTTCCTTCTCTTAAAAGGTCCATGGCAGGAGCTAGATCCGCCCGACTTTTCAAAACATACTGCCCCTTGCCATCATAGC CGCCTCGAGTGGTTTTCAAAACACAAGGATAGCCGATCCCGTCAATCGCATCTTGGATATCCGTCGGACTGACGA…
pstS	CATCGGGCACTCTGATGTATTTGCAGAAGAAGAGACGGAGTTGATGCTTCAAAATTAGTGGATCATAAAGTAGCAGTGGT CGGGATGGCACCAATCGTCAATAAAGATACAGATGTCAAAGATATCACCAAACAGGAATTGATTGATATCTTTACAGGAA AAATCACTAACTGGAAGGAAGTTGGCGGGAAAGATCAAAAAATCAACGTCGTGAACCGTGCAAACGGCAGCGGTACCCGC GCGACATTCGAAAAATGGGGACTGGATGGTGCTACCCCTGTGCAGTCCCAAGAACAAGATTCATCAGGAACAGTTCGGCA GCTGGTAAGTCAAACACCAGGAGCAATCAGCTATTTAGCTTTCTCATATCTCGATGATTCCACACAAGCACTAAG…
atpA	TTTACATCTCAACATGATCAGACATGTTTACCGTTGTACATGAACTCTTCACCCATTGCAGTACCAGCATATGGTGCGAT ATAAAGCAACGGCGCTGGTTGAGACGCACCGGCATTCACAACGATTGTGTAATCCATTGCGCCATATTTTTTCAATGTTT CAACTTGTGTACGAACTGTAGAATCTTTTTGTCCGATTGCTACATAGATACAGATCATATCTTGACCTTTTTGGTTGATG ATCGTATCGATCGCAATAGAAGTTTTCCCTGTTTTACGGTCACCGATAACTAATTCACGTTGGCCACGTCCGATTGGTAC AAGAGCGTCGATTGCTTTTAGACCTGTTTGCATTGGTTCGTTAACAGATTTACGTTGCATAACGCCTGGTGCCAT…
gyd	AAATGTTTTGTCGCCAACTGTCATTACTTTAGTTTGTGTAGCATCAAATAATGAACCGTAAGTCATACCAACGATATCTG AGGAAACGATTTCGTCTGTGTTGTATCCGTAAGATTCGTTTGAAGCTTCTTTCATTGCTGCATTGATTTCGTCAACAGTT ACTTCTTTTTCAAGAACTGTTACTAATTCTGTTAATGAACCTGTTGGTACAGGAACACGTTGAGCAGCTCCGTCTAATTT ACCGTTCAATTCGGGAATTACTAAACCGATAGCTTTAGCAGCACCTGTTGAGTTAGGAACGATGTTTGCAGCAGCAGCGC GTGCACGGCGGAAGTCACCTTTAGGATGAGGTCCGTCTAGAGTCATTTGGTCACCTGTGTAAGCGTGGATAGTTG…
adk	TGCTAGTCTCGTTATCATCTTCTCTTTGATAGAATTCATGCCCACCGCAACGATCACATGTGTCTTCAACTTTTGTAGGG TTGAAAATTTTATGGTAAGTTGCTCCACAATTGCTGCAGATAAATCGGCCGGCTAGACGTTCGACCAAGATTTCTTCACC AACATGGATATCGATGACAGCATCAATTTTTTTATTCAAATCTTTTAGCATTGCGTCCAGAGCTTTTGCTTGATCTAGCG TACGTGGAAAGCCATCTAATAAGAAGCCTTTCTCTGTATCTGGTTCAGCTAGTCGCTCTTTCACGATTCCATTTGTTACT TCATCAGGAACTAATGCACCTTTATCCATATAAGACTTTGCTTCCAGGCCAAGAGCTGTTTCGTTTTGCATCGCT…
ddl	GCAGCGATGACAGTGCATGTGCCATGGATAAAATCATGACCAAGTATATTTTACAAGCTGCTGGTGTGCCGCAAGTTCCT TATGTACCAGTACTTAAGAATCAATGGAAAGAAAATCCTAAAAAAGTATTTGATCAATGTGAAGGTTCTTTGCTTTATCC GATGTTTGTCAAACCGGCGAATATGGGTTCTAGTGTCGGCATTACAAAAGCAGAAAACCGAGAAGAGCTGCAAAATGCTT TAGCAACAGCCTATCAGTATGATTCTCGAGCAATCGTTGAACAAGGAATTGAAGCGCGCGAAATCGAAGTTGCTGTATTA GGAAATGAAGACGTTCGGACGACTTTGCCTGGTGAAGTCGTAAAAGACGTAGCATTCTATGATTATGAAGCAAAA…
